# Supplementary material
Source: ML conference proceedings conference paper supplement (https://openreview.net/forum?id=TAXFsg6ZaOl)
Supplement: supplementary_material [file attachment]

# The Machine Learning Reproducibility Checklist (v2.0, Apr.7 2020)

For all **models** and **algorithms** presented, check if you include:

- ☒ A clear description of the mathematical setting, algorithm, and/or model.
- ☒ A clear explanation of any assumptions.
- ☒ An analysis of the complexity (time, space, sample size) of any algorithm.

For any **theoretical claim**, check if you include:

- ☐ A clear statement of the claim.
- ☐ A complete proof of the claim.

For all **datasets** used, check if you include:

- ☒ The relevant statistics, such as number of examples.
- ☒ The details of train / validation / test splits.
- ☒ An explanation of any data that were excluded, and all pre-processing step.
- ☒ A link to a downloadable version of the dataset or simulation environment.
- ☒ For new data collected, a complete description of the data collection process, such as instructions to annotators and methods for quality control.

For all shared **code** related to this work, check if you include:

- ☒ Specification of dependencies.
- ☒ Training code.
- ☒ Evaluation code.
- ☒ (Pre-)trained model(s).
- ☒ README file includes table of results accompanied by precise command to run to produce those results.

For all reported **experimental results**, check if you include:

- ☒ The range of hyper-parameters considered, method to select the best hyper-parameter configuration, and specification of all hyper-parameters used to generate results.
- ☒ The exact number of training and evaluation runs.
- ☒ A clear definition of the specific measure or statistics used to report results.
- ☐ A description of results with central tendency (e.g. mean) & variation (e.g. error bars).
- ☐ The average runtime for each result, or estimated energy cost.
- ☒ A description of the computing infrastructure used.
